# Supplementary material for: In Vivo Long‐Term Biodistribution, Excretion, and Toxicology of PEGylated Transition‐Metal Dichalcogenides MS2 (M = Mo, W, Ti) Nanosheets
Source: PubMed Central journal article supplement (PMC5238746; doi:10.1002/advs.201600160), 2016-05-27
Supplement: ADVS-4-0-s001.pdf [file ADVS-4-0-s001.pdf]

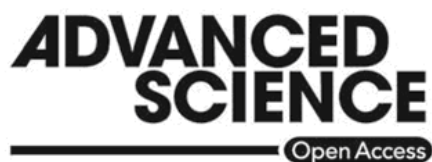

## Supporting Information

for *Adv. Sci.*, DOI: 10.1002/adv.201600160

In Vivo Long-Term Biodistribution, Excretion, and  
Toxicology of PEGylated Transition-Metal Dichalcogenides  
MS<sub>2</sub> (M = Mo, W, Ti) Nanosheets

*Jiali Hao, Guosheng Song, Teng Liu, Xuan Yi, Kai Yang,  
Liang Cheng,\* and Zhuang Liu\**

# Supporting Information

## In Vivo Long-Term Biodistribution, Excretion and Toxicology of PEGylated Transition-Metal

### Dichalcogenides MS<sub>2</sub> (M=Mo, W, Ti) Nanosheets

Jiali Hao<sup>1</sup>, Guosheng Song<sup>1</sup>, Teng Liu<sup>1</sup>, Xuan Yi<sup>2</sup>, Kai Yang<sup>2</sup>, Liang Cheng<sup>1\*</sup>, and Zhuang Liu<sup>1\*</sup>

<sup>1</sup>Institute of Functional Nano & Soft Materials (FUNSOM), Collaborative Innovation Center of Suzhou Nano Science and Technology, Soochow University, Suzhou, Jiangsu 215123, China

<sup>2</sup>School of Radiation Medicine and Protection & School for Radiological and Interdisciplinary Sciences (RAD-X), Jiangsu Provincial Key Laboratory of Radiation Medicine and Protection.

Soochow University, Suzhou, Jiangsu, 21513, China

Email: [zliu@suda.edu.cn](mailto:zliu@suda.edu.cn); [lcheng2@suda.edu.cn](mailto:lcheng2@suda.edu.cn)

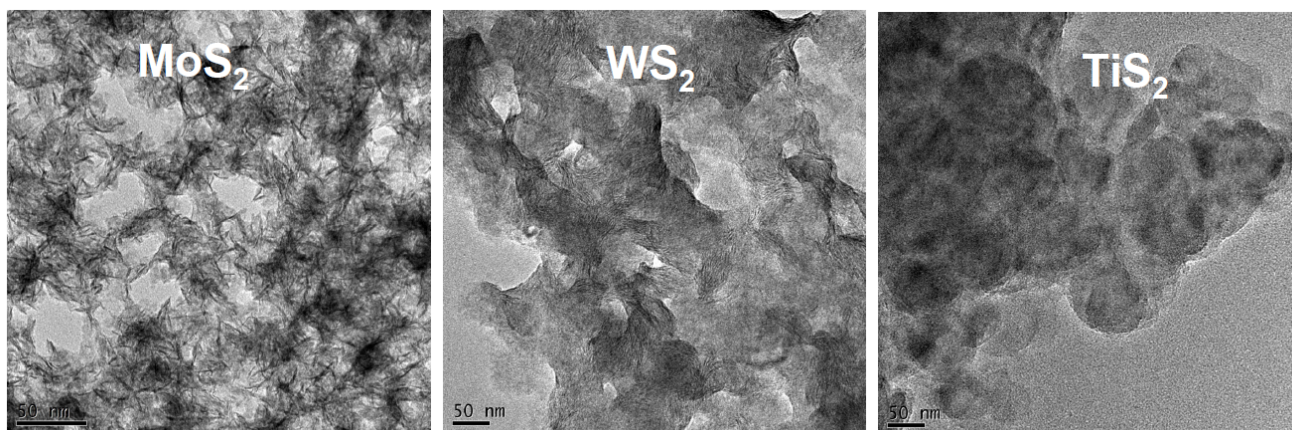

**Supporting Figure S1** TEM images of the MoS<sub>2</sub>, WS<sub>2</sub>, and TiS<sub>2</sub> nanoflakes synthesized by the high-temperature thermal decomposition method.

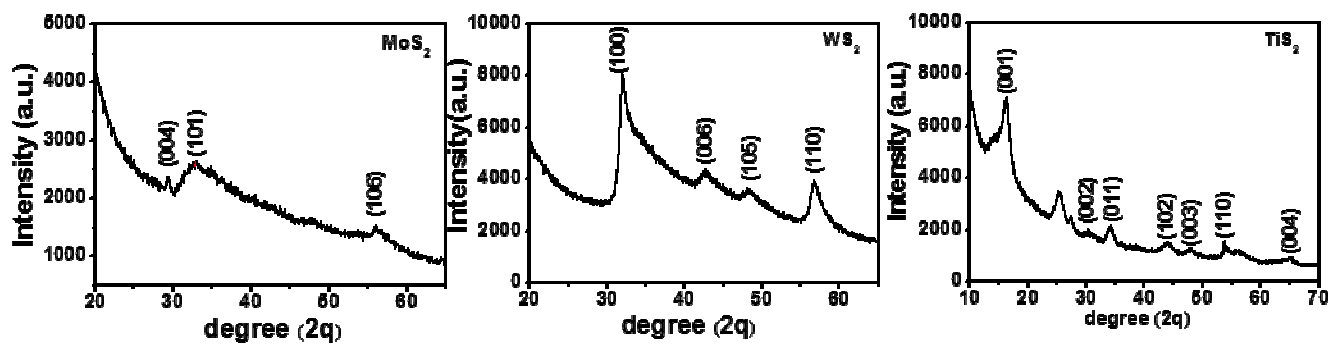

**Supporting Figure S2.** XRD spectra of the MoS<sub>2</sub>, WS<sub>2</sub>, and TiS<sub>2</sub> nanosheets under the ultrasonic decomposition each flakes.

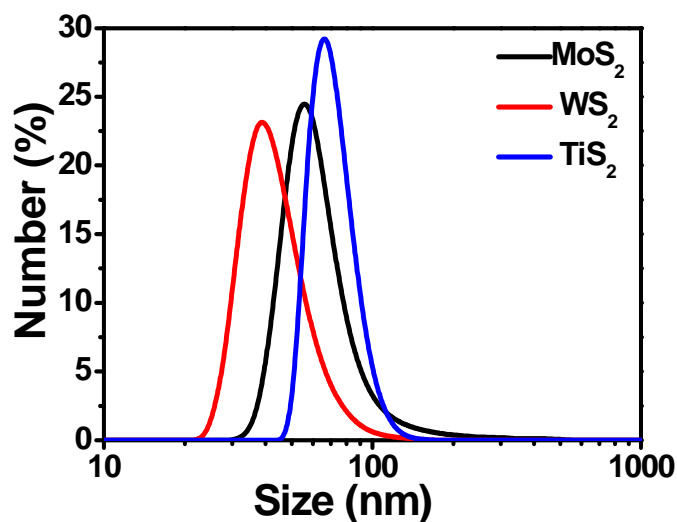

**Supporting Figure S3** DLS size distribution of MoS<sub>2</sub>, WS<sub>2</sub>, and TiS<sub>2</sub> nanosheets in water.

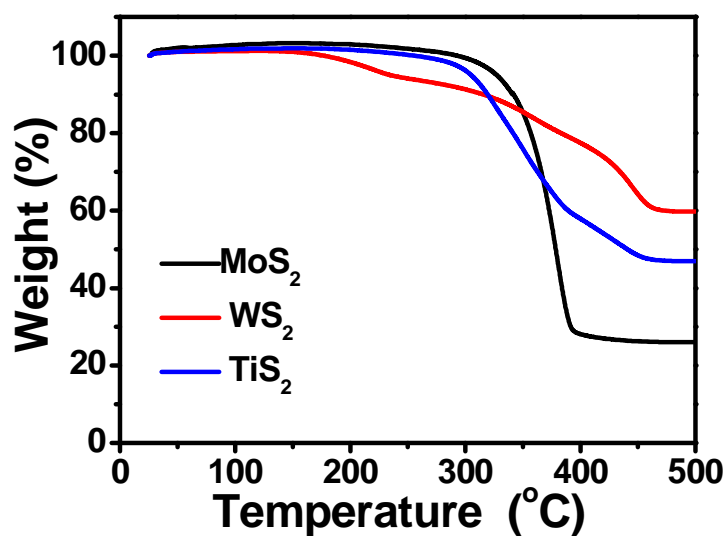

Supporting Figure S4 The weight percentage of MoS<sub>2</sub>, WS<sub>2</sub>, and TiS<sub>2</sub> in PEGylated MoS<sub>2</sub>, WS<sub>2</sub>, and TiS<sub>2</sub>.

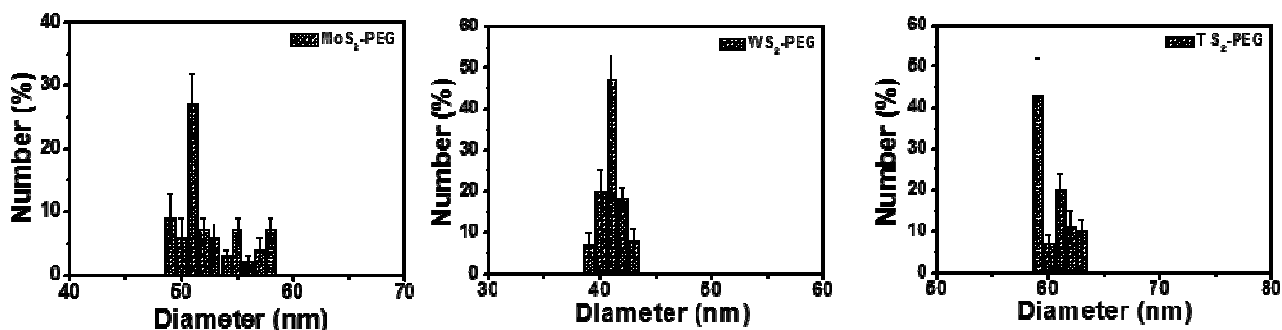

Supporting Figure S5 The size of PEGylated MoS<sub>2</sub>, WS<sub>2</sub>, and TiS<sub>2</sub> under TEM.

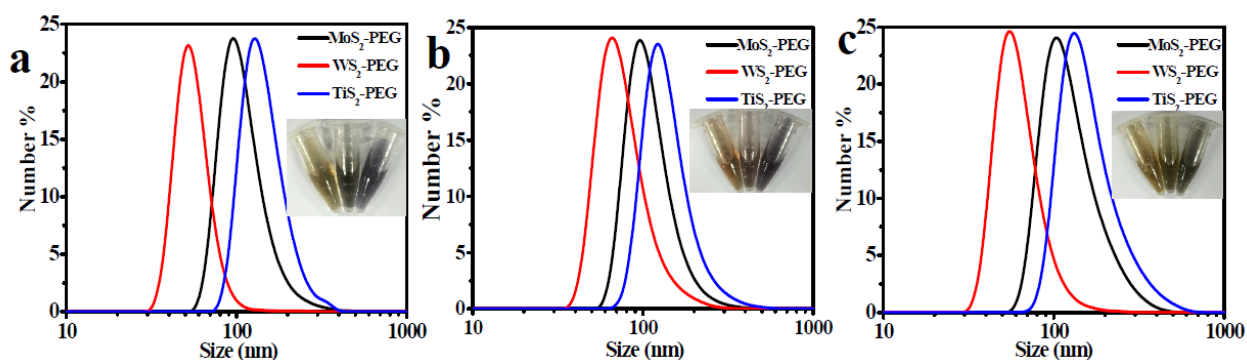

**Supporting Figure S6** DLS size distribution of PEGylated MoS<sub>2</sub>, WS<sub>2</sub>, and TiS<sub>2</sub> in different solutions. **a)** Phosphate buffered saline (PBS). **b)** RMPI-1640 cell medium, and **c)** fetal bovine serum (FBS).

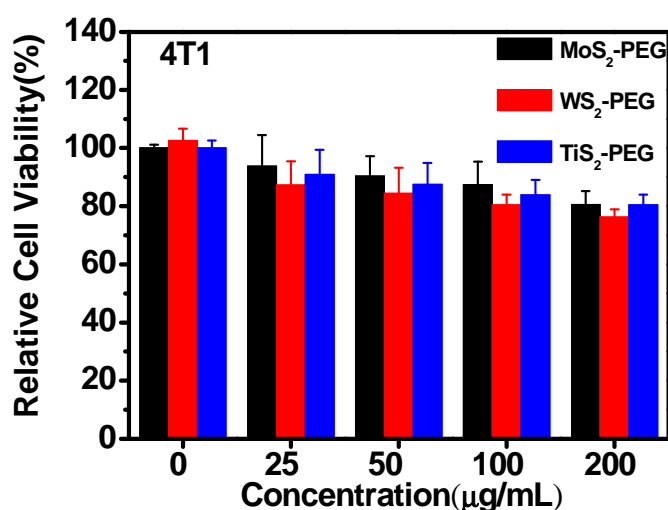

**Supporting Figure S7** Relative cell viability of 4T1 cell line after incubation with PEGylated MoS<sub>2</sub>, WS<sub>2</sub>, and TiS<sub>2</sub> respectively at different concentrations (in terms of TMDC weight concentrations) for 24 h.

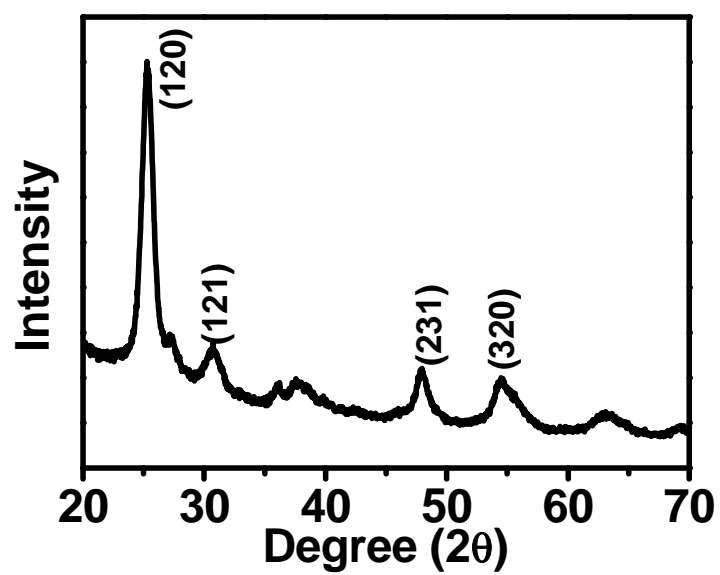

**Supporting Figure S8** XRD spectrum of the PEGylated  $\text{TiS}_2$  after 3 months standing in PBS solution at room temperature. It can be found the  $\text{TiS}_2$  nanosheets were hydrolyzed to form  $\text{TiO}_2$  nanostructures.
